1 **Shotgun metagenomics reveals an enrichment of potentially cross-reactive bacterial epitopes in**  
2 **ankylosing spondylitis patients, as well as the effects of TNFi therapy and the host's genotype upon**  
3 **microbiome composition.**

4  
5 Jian Yin<sup>1\*</sup>, Peter R. Sternes<sup>2\*</sup>, Mingbang Wang<sup>3</sup>, Mark Morrison<sup>4</sup>, Jing Song<sup>1</sup>, Ting Li<sup>1</sup>, Ling Zhou<sup>1</sup>, Xin Wu<sup>1</sup>,  
6 Fusheng He<sup>5</sup>, Jian Zhu<sup>6</sup>, Matthew A. Brown<sup>2,9</sup>, Huji Xu<sup>1,6,7<sup>9</sup></sup>.

- 7  
8 1. Department of Rheumatology and Immunology, Shanghai Changzheng Hospital, Second Military Medical University,  
9 Shanghai, China.  
10 2. Translational Genomics Group, Institute of Health and Biomedical Innovation, Queensland University of Technology,  
11 Translational Research Institute, Brisbane, Australia.  
12 3. Shanghai Key Laboratory of Birth Defects, Division of Neonatology, Children's Hospital of Fudan University, National Center  
13 for Children's Health, Shanghai, 201102, China.  
14 4. University of Queensland Diamantina Institute, Faculty of Medicine, Translational Research Institute, Brisbane, Australia.  
15 5. Immunobio, Shenzhen, Guangdong, 518001, China.  
16 6. Beijing Tsinghua Changgung Hospital, School of Clinical Medicine, Tsinghua University, Beijing 100084, China.  
17 7. Peking-Tsinghua Center for Life Sciences, Tsinghua University, Beijing 100084, China.

18  
19 \*These authors contributed equally to this manuscript.  
20 <sup>9</sup> These authors contributed equally to this manuscript.

21  
22 Corresponding Author:  
23 Professor Matthew A. Brown,  
24 Institute of Health and Biomedical Innovation,  
25 Queensland University of Technology,  
26 Translational Research Institute,  
27 Princess Alexandra Hospital,  
28 Woolloongabba, Brisbane,  
29 Australia.  
30 Telephone: +61 7 3443 7366  
31 Fax : +61 7 3443 7102  
32 matt.brown@qut.edu.au

33  
34 Corresponding Author:  
35 Professor Huji Xu  
36 Beijing Tsinghua Changgeng Hospital  
37 School of Clinical Medicine  
38 Tsinghua University, Beijing 100084, China.  
39 Phone: +86-10-6279 2998  
40 Fax: +86-10-6278 9513  
41 email: huji\_xu@tsinghua.edu.cn

42 **ABSTRACT**

43 Diverse evidence including clinical, genetic and microbiome studies support a major role of the gut  
44 microbiome in the common immune-mediated arthropathy, ankylosing spondylitis (AS). To further  
45 investigate this we performed metagenomic analysis of a case-control cohort of 250 Han-Chinese  
46 subjects. Previous reports of gut dysbiosis in AS were re-confirmed and several notable bacterial species  
47 and functional categories were differentially abundant. TNF-inhibitor (TNFi) therapy at least partially  
48 restored the perturbed microbiome observed in untreated AS cases to that of healthy controls, including  
49 several important bacterial species that have been previously associated with AS and other related  
50 diseases. Enrichment of bacterial peptides homologous to HLA-B27-presented epitopes was observed in  
51 the stools of AS patients, suggesting that either HLA-B27 fails to clear these or that they are involved in  
52 driving HLA-B27-associated immune reactions. TNFi therapy of AS patients was also associated with a  
53 reduction of potentially arthritogenic bacterial peptides, relative to untreated patients. An AS-associated  
54 SNP in *RUNX3* significantly influenced the microbiome in two independent cohorts, highlighting a host  
55 genotype (other than *HLA-B27*) potentially influencing AS via the microbiome. These findings emphasise  
56 the key role that the gut microbiome plays in driving the pathogenesis of AS.

## 57 INTRODUCTION

58 Ankylosing spondylitis (AS) is a chronic inflammatory disease affecting primarily the spine and pelvis,  
59 causing pain and initially reversible stiffness, and ultimately leading to joint ankylosis due to ectopic  
60 bone formation. In a subset of patients, peripheral joints and extra articular tissues including the eye,  
61 gut and skin are also involved. Its prevalence in Asian and European descent populations ranges from  
62 0.09% to 0.55% <sup>1,2</sup>, whereas the disease is rare in most of Africa, likely due to the low frequency of the  
63 main susceptibility gene, *HLA-B27* <sup>3</sup>. There is a significant unmet therapeutic need in AS, with limited  
64 evidence that current therapies prevent spinal ankylosis, no oral treatments which suppress disease  
65 activity other than corticosteroids, and no treatments which have been demonstrated to induce  
66 remission or prevent the disease.

67

68 AS has been shown in both twin and unrelated case/control studies to be highly heritable (twins >90%  
69 heritability <sup>4,5</sup>, unrelated case/control common variant heritability 69%  
70 (<http://www.nealelab.is/blog/2017/9/15/heritability-of-2000-traits-and-disorders-in-the-uk-biobank>)).

71 Over past decade, at least 116 susceptibility genes have been identified, contributing 29% of the overall  
72 risk of the disease <sup>6</sup>. There is substantial evidence suggesting that the interaction between host genetics  
73 and gut microbiome is a key driver of the pathogenesis of AS. The high disease heritability indicates that  
74 the environmental factors involved in the disease are likely to be ubiquitous. Reactive arthritis is a  
75 spondyloarthritis sharing many clinical and genetic features with AS, and is known to be caused by  
76 bacterial infections of the gut or urinary tract; a subset of reactive arthritis patients go on to develop AS.  
77 About 60% AS patients suffered from subclinical bowel inflammation and 10% of them can be diagnosed  
78 as inflammatory bowel disease (IBD) <sup>7</sup>. There is considerable overlap in the overall heritability of AS and  
79 IBD <sup>8</sup>, the two diseases are often co-familial <sup>9</sup>, and many shared genetic associations have been  
80 identified <sup>10</sup>. A bioinformatic study showed that AS susceptibility genes specifically enriched in gut cells

81 are also enriched in 'response to bacterium' GO term pathway, and that AS-associated genetic loci are  
82 found disproportionately to lie within epigenetic marks of gene activity in gut tissue and cells <sup>11</sup>.  
83 Germ-free *HLA-B27*-transgenic rats and SKG mice are disease-free <sup>12,13</sup>. Studies using sequencing-  
84 based bacterial profiling of terminal ileal biopsies showed that AS patients have a distinct microbiome <sup>14</sup>,  
85 a finding that has subsequently been reproduced studying stool samples in AS patients and patients with  
86 spondyloarthritis (SpA), a broader clinical classification <sup>15,16</sup>. There has also been suggestive evidence  
87 reported that the gut microbiome is associated with differences in AS disease activity <sup>17</sup>. In addition, one  
88 study compared SpA patients' stool samples before and three months after TNF-inhibitor (TNFi)  
89 treatment onset <sup>18</sup>. Although modest changes were found in microbiome alpha-diversity measures after  
90 TNFi treatment, no changes in specific bacterial taxa were observed. This may have been related to  
91 power or sampling issues, noting that 15/18 patients studied met only the ASAS axial spondyloarthritis  
92 classification criteria rather than having the more specific diagnosis, AS. In summation, the above  
93 evidence supports the contention that AS status is influenced by interactions between the gut  
94 microbiome and the host immune system.

95

96 To date, the mechanisms involved in the interaction between the host immune system and intestinal  
97 microbes remain unclear. One hypothesis suggests that HLA-B27 presents specific peptides to CD8+ T  
98 cells, leading to pathogenic adaptive immune responses (the 'arthritogenic peptide theory'). The gut  
99 microbiota produce a huge variety and number of peptides, and as such, microbial peptides intrinsic to  
100 dysbiosis may activate CD8+ T-cells. In that context, Purcell and colleagues identified 7500 such peptides  
101 that bind the eight most common *HLA-B27* subtypes <sup>19</sup>. Here, we present our findings from a shotgun  
102 metagenomics sequencing study undertaken with stool samples collected from in 250 Chinese  
103 individuals, to investigate evidence of dysbiosis in AS, the effect of host genetic makeup and of TNFi

- 104 treatment on the gut microbiota, and to investigate evidence of immunity to HLA-B27 restricted  
105 microbial peptides in AS cases.

## 106 **MATERIALS AND METHODS**

### 107 **Subject recruitment**

108 A total of 127 unrelated Han Chinese AS cases were recruited from the Department of Rheumatology  
109 and Immunology of Shanghai Changzheng Hospital (Shanghai, China) from December 2014 to June 2017.  
110 All cases met the 1984 modified New York criteria for AS <sup>20</sup>. 123 healthy controls (blood donors on no  
111 prescription medications) were recruited from Shanghai. All human studies have been approved by the  
112 Research Ethical Committee of Second Military Medical University, and all patients and controls gave  
113 informed written consent for their participation in the studies. Clinical information was recorded for all  
114 patients, including demographic information (gender, age, smoking status and BMI), disease duration,  
115 *HLA-B27* carriage, sulfasalazine and TNFi treatment information, the Bath Ankylosing Spondylitis Disease  
116 Activity Index (BASDAI) <sup>21</sup> and Bath Ankylosing Spondylitis Functional Index (BASFI) <sup>22</sup>, and clinical  
117 manifestations (inflammatory back pain, uveitis, axial arthritis, peripheral arthritis, ulcerative colitis,  
118 Crohns disease, enthesitis, dactylitis and psoriasis). Dietary habits were assessed by a 52-question  
119 questionnaire to exclude subjects with special dietary habits such as an entirely plant-based or meat-  
120 based diet. Where possible, Student's T test and Fisher's exact test were used to identify differences in  
121 the metadata categories between cases and controls.

122

### 123 **DNA microarray and subject genotyping**

124 Samples were genotyped using the Infinium CoreExome-24v1-1 Chip (Illumina, San Diego, CA, USA)  
125 according to the manufacturer's recommendations. Bead intensity data were processed and normalised  
126 for each sample, and genotypes called within collection using GenomeStudio.

127

128 SNPs with call rate below 95% or with a Hardy-Weinberg equilibrium of  $P < 10^{-6}$  in controls were  
129 excluded. For the overlapping SNPs, pairwise missingness tests removed all SNPs with differential

130 missingness ( $P < 10^{-7}$ ). After merging data sets, SNPs with call rate below 98% and samples with call rate  
131 below 98% were removed. *HLA* alleles were imputed by SNP2HLA using the Pan-Asian reference panel  
132 <sup>23,24</sup> and SNPs were extracted by PLINK v.1.90 <sup>25</sup>.

133

#### 134 **Shotgun metagenome sequencing**

135 Faecal samples were collected and stored at  $-80^{\circ}\text{C}$  prior to DNA extraction. DNA was extracted using a  
136 StoolGen DNA kit (CWBiotech Co., Beijing, China). DNA concentrations were determined using a Qubit  
137 dsDNA BR assay kit (Thermo Fisher, Foster City, CA, USA). 200 – 500 bp insert size libraries were  
138 constructed using a TruSeq DNA Sample Preparation Kit (Illumina, San Diego, CA, USA) and an  
139 automated SPRI-Works system (Beckman Coulter, San Jose, CA, USA),

140

141 Quality Control (QC) of each library was carried out using an Agilent 2100 Bioanalyzer (Agilent  
142 Technologies, Santa Clara, CA, USA), Qubit dsDNA BR assay kit (Thermo Fisher, Foster City, CA, USA) and  
143 a KAPA qPCR MasterMix plus Primer Premix kit (Kapa Biosystems, Woburn, MA, USA) according to the  
144 manufacturer's instructions. Libraries that passed QC ( $>3 \text{ ng}/\mu\text{L}$ ) were sequenced using an Illumina  
145 HiSeq sequencer (Illumina, San Diego, CA, USA) with the paired-end 150-bp sequencing model based on  
146  $>5\text{G}$  raw data output per sample.

147

148 Manual inspection and QC of sequencing reads was conducted using FastQC v10.1 <sup>26</sup>. Paired-end reads  
149 were joined using PEAR v0.9.10 <sup>27</sup> and adapters were trimmed using Trimmomatic v0.36 <sup>28</sup>. Contaminant  
150 sequences, such as those mapping to human or PhiX genomes, were filtered using Bowtie2 v2.3.4 <sup>29</sup> and  
151 the remaining reads were counted and subsampled to an equal sequencing depth of 3,520,000  
152 sequencing reads per sample using SeqTK v1.0 <sup>30</sup>. MetaPhlan2 v2.6.0 <sup>31</sup> was used for taxonomic  
153 classification, PanPhlan v1.2.2 <sup>32</sup> was used for strain-level profiling utilising pre-computed pan-genome

154 references where possible, and HUMAnN2 v0.11.1<sup>33</sup> was used for functional mapping to KEGG  
155 Orthogroups (KO) and MetaCyc pathways and utilising a UniRef90 database.

156  
157 For prediction of bacterial peptides homologous to previously reported HLA-B27-presented epitopes,  
158 bacterial-derived sequencing reads were BLASTXed against a local, BLAST-formatted<sup>34</sup>, version of the  
159 immune epitope database (IEDB) v3.0 (downloaded August 2016)<sup>35,36</sup>. BLAST best-hits with an E-value <  
160 0.1 were retained, annotated according to a published study<sup>37</sup> and then counted. The peptides  
161 annotated as HLA-B27-presented were compared between AS patients and healthy controls using  
162 Fisher's exact test.

163

#### 164 **Statistical Analysis**

165 Abundance tables were arcsine square root transformed prior to analysis. Multidimensional data  
166 visualisation was conducted using a sparse partial least squares discriminant analysis (sPLSDA) as  
167 implemented in R as part of the MixOmics package v6.3.1<sup>38</sup>, at the species level using Bray-Curtis  
168 distance matrices. Receiver operating characteristic curve was calculated from sPLSDA using the  
169 MixOmics package v6.3.1. Controlling for covariates (such as gender, BMI, age and smoking status)  
170 where appropriate, multivariate association of the bacterial species composition with metadata of  
171 interest was conducted using a PERMANOVA test as part of vegan v2.4-5<sup>39</sup>. The alpha diversity of  
172 bacterial species was calculated using the rarefy function, as implemented in vegan v2.4-5. Univariate  
173 association of bacterial species and functional pathways/groups were tested for significance using  
174 MaAsLin v0.0.5<sup>40</sup> and Wilcoxon rank-sum tests as implemented in R<sup>41</sup>. Only results which were  
175 significant in both tests were reported in the main text. For measurement of microbial epitope richness,  
176 the Shannon, Simpson and Chao diversity indices were measured (vegan v2.4-5) and group differences  
177 were evaluated using Wilcoxon rank-sum tests. Genetic-relatedness dendrograms for strain-level results



178 from PanPhlAn were calculated using Jaccard distance matrices and hierarchical clustering as  
179 implemented in R v.3.5.2.

180

## 181 **RESULTS**

### 182 **Gut dysbiosis in ankylosing spondylitis**

183 We initially sought to confirm previous reports of dysbiosis in AS cases. The case and control cohorts  
184 were divided into discovery and validation cohorts prior to analysis; the discovery cohort consisted of 97  
185 AS cases and 93 healthy controls with age-matched demographics, and the remaining 60 subjects  
186 comprised the validation cohort (30 AS cases and 30 healthy controls) (Supplementary Table 1). With  
187 the exception of a difference in the mean age in the validation cohorts in which the controls were  
188 younger on average than cases, no differences were observed between cases and controls in either the  
189 discovery or validation cohorts. PERMANOVA and sPLSDA multivariate analysis revealed significant  
190 differentiation between the microbial composition of AS cases and healthy controls for both the  
191 discovery ( $P = 0.019$ ) and validation ( $P = 0.0006$ ) cohorts (Figure 1A), consistent with previous reports.  
192 Receiver-operator curve analysis showed high discrimination between cases and controls using  
193 microbiome data alone (AUC=0.87 in combined discovery and validation cohorts) (Supplementary Figure  
194 1).

195

196 Seven bacterial species were identified to be differentially abundant ( $P < 0.05$ ) (i.e. were 'indicator  
197 species') between AS cases and healthy controls, in both the discovery and validation cohorts (Figure  
198 1B). *Clostridiales bacterium 1 7 47FAA*, *Clostridium bolteae* and *Clostridium hatheway* were found to be  
199 enriched in AS cases, whilst *Bifidobacterium adolescentis*, *Coprococcus comes*, *Lachnospiraceae*  
200 *bacterium 5 1 63FAA* and *Roseburia inulinivorans* were depleted. Several other differentially abundant  
201 species of interest were identified in either the discovery or validation cohort, notably *Prevotella copri*,

202 *Dialister invisus* and *Faecalibacterium prausnitzii*. A full list of differentially abundant taxa in either  
203 cohort is available in Supplementary Table 2.

204  
205 Six KEGG Orthogroups were also found to be differentially abundant ( $P < 0.05$ ) in both cohorts (Figure  
206 1C), however there were no MetaCyc metabolic pathways which were differentially abundant in both  
207 cohorts. The commonly-differentiated KEGG Orthogroups were EC 2.6.1.9: histidinol-phosphate  
208 transaminase, EC 2.7.4.1: polyphosphate kinase, EC 4.3.3.6: pyridoxal 5'-phosphate synthase, EC  
209 1.15.1.1: superoxide proteinase, EC 3.4.21.53: ATP-dependent serine phosphatase, and EC 2.4.2.17: ATP  
210 phosphoribosyltransferase. Full lists of the differentially abundant KEGG Orthogroups and MetaCyc  
211 metabolic pathways are available in Supplementary Tables 3 and 4, respectively.

212  
213 Linear regression was used to investigate the correlation between the indicator species and the  
214 commonly-differentiated KEGG Orthogroups. All indicator species, except for *Lachnospiraceae*  
215 *bacterium 5 1 63FAA*, were significantly associated ( $P < 0.05$ ) with the KEGG Orthogroups, however the  
216 degree of variation explained by these species was typically low with  $R^2$  values ranging from 0.0008 to  
217 0.13 (0.043 on average) (Supplementary Table 5).

218  
219 Strain-level profiling of the dysbiotic microbes identified in Figure 1B uncovered no discernible  
220 differences in strain composition between AS cases and healthy controls, with identical strains often  
221 being observed in both case and control subjects. (Supplementary Figure 2). This suggests that gut  
222 dysbiosis may primarily be a result of differential abundance at the species level and that functional or  
223 metabolic differences in the microbiome occur from common genetic elements amongst the strain  
224 population, as evidenced by KEGG Orthogroups being detectable in the majority of samples in Figure 1C.

225

## 226 **Effect of TNFi therapy upon the microbiome**

227 TNFi treatment is highly effective in AS, and it is feasible that at least some of its benefits occur through  
228 effects on the gut microbiome. To test this hypothesis, the discovery and validation cohorts were  
229 combined into the following categories: healthy controls (n = 123), AS cases treated with TNFi (either  
230 etanercept or infliximab, n = 67), and AS cases who have not received TNFi treatment (n = 60). No  
231 statistically significant effect of sulfasalazine treatment was observed (P=0.76, Supplementary Figure 3).  
232 Multivariate comparison of TNFi untreated and treated cases revealed an effect of TNFi treatment upon  
233 the overall composition of the microbiome (P = 0.022) (Figure 2A). Untreated cases were significantly  
234 different to healthy controls (P = 0.0002), whereas treated cases were not significantly different to  
235 healthy controls (P = 0.069) indicating that treatment has helped restore the perturbed composition of  
236 the microbiome.

237  
238 To identify the key species modulated by the effects of TNFi therapy, species which were both (a)  
239 perturbed in untreated AS cases relative to healthy controls, and (b) differently abundant in treated  
240 cases compared to untreated cases, were first identified (Figure 2B and Supplementary Table 6). Six of  
241 the eight identified species exhibited significant depletion in untreated AS cases, however TNFi  
242 treatment appeared to restore the abundance of these species to levels indistinguishable from healthy  
243 controls. These species were: *Prevotella copri*, *Faecalibacterium prausnitzii*, *Bilophila unclassified*,  
244 *Klebsiella pneumoniae*, *Ruminococcus bromii* and *Eubacterium bifforme*. The remaining two species  
245 (*Clostridium symbiosum* and *Eggerthella unclassified*) were enriched in untreated AS and their  
246 abundance was no longer different to healthy controls in treated cases. The findings in relation to  
247 *Prevotella copri* and *Klebsiella pneumoniae* were of particular interest given their previous association  
248 with rheumatoid arthritis (RA) and AS, respectively, as was the highly abundant (approximately 20% of  
249 total bacterial DNA, on average) *Faecalibacterium prausnitzii* for its notable depletion in several

250 autoimmune diseases<sup>42</sup>. TNFi therapy appeared to partially normalise the dysbiotic bacterial species  
251 and KEGG Orthogroups observed in AS cases relative to healthy controls shown in Figures 1B and 1C,  
252 however no statistically significant differences between treated and untreated cases were observed,  
253 potentially due to sample size constraints (Supplementary Figure 4).

254  
255 The above approach was also used to identify metabolic pathways modulated by TNFi therapy. 20  
256 MetaCyc metabolic pathways were identified in total and the perturbed abundance observed in  
257 untreated AS cases was restored to healthy control levels in 17 of these. In broad terms, these pathways  
258 primarily related to amino acid biosynthesis (notably branched-chain and aromatic amino acid  
259 biosynthesis), carbohydrate metabolism (notably starch degradation), nucleotide biosynthesis,  
260 metabolite biosynthesis and cell structure. Specific details of the 20 differentially abundant MetaCyc  
261 pathways are available in Supplementary Table 7.

262  
263 Linear regression was used to investigate the association of between the modulated species and  
264 modulated pathways (Supplementary Table 8). Except for PWY-6545: Pyrimidine biosynthesis which was  
265 not associated with any individual identified species, all the pathways were significantly associated with  
266 at least two of the identified species. Similarly, all the species were significantly associated with multiple  
267 pathways, however the abundances of *Bilophila unclassified* and *Klebsiella pneumoniae* were inversely  
268 correlated with pathway abundance. An increase in *Klebsiella pneumoniae* was associated with a  
269 decrease in the abundance of PWY-6737: starch degradation ( $P = 0.014$ ;  $R^2 = -0.0426$ ). The observed  
270 decrease in the starch degradation pathway for untreated AS cases is primarily attributed to a depletion  
271 of *Faecalibacterium prausnitzii* ( $P = 2.38 \times 10^{-24}$ ;  $R^2 = 0.3123$ ). *Faecalibacterium prausnitzii* also exhibited  
272 strong associations with other metabolic pathways.

273

274 Strain-level profiling of the bacterial species outlined in Figure 2B also revealed no discernible  
275 differences in strain composition between healthy controls, treated cases and untreated cases,  
276 indicating the TNFi therapy affected the relative abundance of each species, not necessarily the  
277 underlying strain composition (Supplementary Figure 5).

278

### 279 **Effect of host genotype upon the microbiome**

280 Genome-wide association studies (GWAS) have identified many genetic loci which are associated with  
281 AS. Emerging evidence indicates that alleles such as *HLA-B27* may influence the disease through its  
282 effect upon the gut microbiome<sup>43,44</sup>. To investigate whether additional loci may affect the gut  
283 microbiome and potentially influence disease, we performed PERMANOVA analysis upon loci known to  
284 be associated with AS.

285

286 Considering non-MHC loci, an association was noted for rs11249215, a SNP in the promoter of runt-  
287 related transcription factor 3 (*RUNX3*) gene known to be associated with AS<sup>45,46</sup>. This variant was  
288 associated with a shift in the microbiome of both AS cases and healthy controls (combined  $P = 0.0097$ ).  
289 Furthermore, sPLSDA revealed that the degree alteration appears dependent on whether the host  
290 carried a heterozygous or homozygous genotype (Figure 3A), with the homozygous genotype resulting in  
291 a more substantial shift. As further confirmation, we analysed a recently published 16S metabarcoding  
292 dataset<sup>47</sup> of 107 healthy control subjects which were sampled from six different body sites. This analysis  
293 re-confirmed discrimination of the microbiomes based on genotype (PERMANOVA;  $P = 0.0001$ ) (Figure  
294 3B). The *RUNX3* SNP had no observable effect upon the dysbiotic bacterial species and KEGG  
295 Orthogroups outlined in Figures 1B and 1C, however its effects upon species richness and community  
296 composition (Figure 3A) suggest that further research is required to confirm a role in AS pathogenesis  
297 via effects upon the microbiome. The effect of *HLA-B27* upon the microbiome of the current cohort was

298 unable to be investigated due to high prevalence of this genotype in AS cases and low prevalence in  
299 healthy controls, thus the effect of *HLA-B27* was unable to be discerned from the effect of AS itself.

300

301 To highlight the key bacterial species affected by rs11249215, species associated with the heterozygous  
302 (AG) and homozygous (GG) genotypes, or solely the homozygous (GG) genotype were identified (Figure  
303 3C). Several bacterial species showed differential abundance for the AG genotype, but not the GG  
304 genotype, potentially due to sample size constraints (the GG genotype was present in 37 of the 188  
305 genotyped subjects), and thus were excluded from further analysis. Four key species identified as  
306 depleted in the AG/GG genotypes were: *Lachnospiraceae bacterium 1 1 57FAA*, *Eubacterium*  
307 *ventriosum*, *Citrobacter freundii* and *Citrobacter unclassified* (Supplementary Table 9).

308

309 Six MetaCyc metabolic pathways were found to be differentially abundant when comparing *RUNX3*  
310 rs11249215 genotypes (Figure 3D). Similar to the differences found for TNFi therapy, the differential  
311 pathways were primarily associated with amino acid and nucleotide biosynthesis, however notable  
312 differences in polyamine biosynthesis and pyruvate fermentation (to acetate and lactate) were also  
313 observed. Of interest is the polyamine biosynthesis pathway for the role of polyamines in enhancing the  
314 integrity of the intestinal epithelial cell barrier, and the adenosine biosynthesis pathway for the anti-  
315 inflammatory and immunosuppressant effect of adenosine (Supplementary Table 10)<sup>48,49</sup>.

316

317 Linear regression of these species with the metabolic pathways revealed relatively marginal  
318 associations, with the two *Citrobacter* species exhibiting no association with any metabolic pathway  
319 (Supplementary Table 11). 16S rRNA gene metabarcoding analysis of the predominately Caucasian  
320 cohort sampled from various body sites (Figure 3B) revealed a different set of taxa and metabolic  
321 pathways potentially influenced by the *RUNX3* SNP (Supplementary Tables 12 and 13). The minimal

322 overlap with the current shotgun metagenomic study is potentially indicative of the differences between  
323 the metagenomic approaches and/or differences in studied cohorts (i.e. geographic location, diet,  
324 ethnicity...etc).

325

326 Similar to the strain-level results for AS status and TNFi therapy, no observable bias in the underlying  
327 strain population was observed, indicating that *RUNX3* variants likely affect the relative abundance of  
328 species, not necessarily strain composition (Supplementary Figure 6<sup>47,50</sup>). Comparatively fewer species  
329 were associated with the *RUNX3* SNP in comparison to the number of species associated with AS status  
330 and TNFi treatment. Consistent with recent publications which have investigated the effect of the host's  
331 genotype upon the abundance of specific taxa<sup>47,50</sup>, these data provide supporting evidence that the  
332 underlying host's genetics may have a generalised effect upon the microbiome, with a subtle effect on a  
333 higher number of taxa as opposed to a marked effect on a select few.

334

### 335 **Bacterial-derived HLA-B27 epitopes in AS cases and healthy controls**

336 The main physiological function of HLA-B27 is to present peptides to CD8 lymphocytes, thereby driving  
337 cell mediated immune reactions. Differences in the presence of HLA-B27-positive epitopes in the gut  
338 microbiome in cases compared to controls, and in HLA-B27 carriers compared with HLA-B27-negative  
339 subjects, would be consistent with effects of HLA-B27 to 'shape' the gut microbiome, and the  
340 significance of this in regards disease pathogenesis.

341

342 To investigate the abundance of bacterial peptides homologous to HLA-B27 epitopes in AS cases and  
343 healthy controls, translated nucleotide searches were performed against IEBD v3.0, annotated according  
344 to a published study<sup>37</sup> and counted. Significant enrichment of these peptide sequences was observed in  
345 AS cases, with 24 of these enriched in both the discovery and validation cohorts (Table 1). AS cases not

346 only exhibited enrichment of these peptides but the overall diversity of peptides was increased, with  
347 Shannon, Inverse Simpson and Chao diversity indices revealing significant differences between AS cases  
348 and healthy controls (Figure 4A).

349

350 TNFi treatment effects were also investigated. The overall abundance and diversity of bacterial peptides  
351 homologous to HLA-B27-presented epitopes was significantly different between the different treatment  
352 categories (Figure 4B). Untreated AS cases exhibited increased abundance and diversity of peptides. For  
353 patients who underwent TNFi therapy, a reduction in these potentially arthritogenic peptides was  
354 observed relative to untreated cases, however their levels remained marginally higher than healthy  
355 controls.



356 **DISCUSSION**

357 **Gut dysbiosis in ankylosing spondylitis**

358 This study re-confirmed the occurrence of bacterial gut dysbiosis in AS cases and identified seven  
359 bacterial species which were commonly differentiated between cases and controls in both the discovery  
360 and validation cohorts (Figure 1B). Two of these species, *Bifidobacterium adolescentis* and *Coprococcus*  
361 *comes*, have been noted for their depletion in Crohn's Disease<sup>51</sup> and were also observed to be depleted  
362 in AS cases in this study. An additional two species previously reported to be associated with AS,  
363 *Prevotella copri* and *Dialister invisus*, were found to be differentially abundant in either the discovery or  
364 validation cohorts (Supplementary Table 2). In the case of *Prevotella copri*, previous studies have  
365 demonstrated enrichment in new onset RA cases yet depletion in chronic RA cases<sup>52</sup>. Consistent with  
366 these findings, our study found that *Prevotella copri* was depleted in AS cases within the non-age-  
367 matched cohort, for which the demographics were heavily skewed towards older AS patients with long-  
368 standing disease (Supplementary Table 1). Previous studies in AS have shown increases in *Prevotellaceae*  
369<sup>14</sup>, or specifically with this species<sup>15</sup>. As discussed below, *Prevotella copri* carriage normalised with TNFi  
370 treatment. Further studies will be required to determine if *Prevotella copri* carriage changes with  
371 disease duration, as has been reported in RA.

372

373 Carriage of *Dialister* species has been previously associated with disease activity in spondylarthrosis  
374 patients<sup>17</sup>, but the carriage of *Dialister invisus* has been reported to be decreased in inflammatory  
375 bowel disease (IBD)<sup>53,54</sup>. Whilst we found enrichment of *Dialister invisus* in AS cases in the discovery  
376 cohort, this was not confirmed in the validation cohort, nor has it been reported in other AS studies. Its  
377 pathogenic significance is therefore uncertain.

378

379 Of particular interest, the notable ‘peace keeping’ microbe *Faecalibacterium prausnitzii* was also found  
380 to be depleted in AS cases in the validation cohort. This bacterium has also been consistently shown to  
381 be depleted in IBD<sup>54-59</sup>, and has been previously shown to be depleted in the disease enthesitis-related  
382 arthritis, a paediatric disease-classification which includes children with ankylosing spondylitis<sup>60</sup>.  
383 *Faecalibacterium prausnitzii* is known to produce butyrate and other metabolites and peptides that have  
384 diverse anti-inflammatory effects including promoting T-regulatory cell differentiation<sup>61</sup>, influences on  
385 Th17 lymphocyte activation, and promotion of gut mucosal barrier function<sup>59,62,63</sup>. As discussed below,  
386 TNFi treatment also led to normalisation of *Faecalibacterium prausnitzii* carriage. These findings suggest  
387 that *Faecalibacterium prausnitzii* plays a key anti-inflammatory role in AS, as it does in IBD.

388  
389 The power of metagenome sequencing is to augment the widely observed phenomena collectively  
390 referred to as “dysbiosis” beyond taxonomy-based assessment of microbiome, and provide a more  
391 highly resolved and functional characterisation of the microbiome. Here, variation in several KEGG  
392 Orthogroups remained consistent between the discovery and validation cohorts (Figure 1C).  
393 Additionally, differential abundance of some MetaCyc metabolic pathways was also observed  
394 (Supplementary Table 4), but these differences were not consistent between discovery and validation  
395 cohorts; potentially highlighting the confounding influence of the host’s age upon the metabolic  
396 composition of the gut microbiome.

397  
398 Interestingly, genes encoding pyridoxal 5'-phosphate synthase, an important enzyme for the  
399 biosynthesis of vitamin B6, were less abundant amongst the microbiome of AS cases compared to  
400 healthy controls in both cohorts. Vitamin B6 plays a role in the maintenance of vitamin homeostasis in  
401 colonocytes<sup>64,65</sup>. It has been found to modulate colonic inflammation and several studies have  
402 investigated the role of vitamin B6 for the treatment of inflammation in RA patients<sup>66-71</sup>. Evidence from

403 case-control studies show that RA patients have low vitamin B6 status compared to healthy controls,  
404 however intervention studies have yielded inconsistent findings, possibly due to the dose of the  
405 administered vitamin B6. The reduced potential for the microbiome of AS patients to produce pyridoxal  
406 5'-phosphate synthase, and thus vitamin B6, may warrant further investigation into intervention  
407 strategies to mitigate inflammation in AS patients.

408

#### 409 **Effect of TNFi therapy upon the microbiome**

410 Previous study of RA patients before and after synthetic disease-modifying anti-rheumatic drug  
411 treatment revealed moderate differences in the gut microbiota composition, with the perturbed  
412 microbial composition being partly restored following treatment<sup>72</sup>. Similarly, analysis of spondylarthrosis  
413 patients before and after TNFi therapy also revealed modest differences in microbial composition yet no  
414 specific taxon was found to be modulated, likely due to sample size<sup>73</sup>. Utilising a larger sample size, we  
415 confirmed that TNFi therapy was correlated with a restoration of the perturbed microbial composition,  
416 and additionally identified several notable bacterial species modulated by treatment.

417

418 We observed that TNFi therapy restored the depletion of *Faecalibacterium prausnitzii* in AS cases.  
419 Restoration of *Faecalibacterium prausnitzii* abundance was also correlated with the restored abundance  
420 of aromatic and branched-chain amino acid biosynthesis pathways. A recent ulcerative colitis study<sup>55</sup>  
421 revealed reduced dysbiosis and increased *Faecalibacterium prausnitzii* abundance in responders  
422 compared with non-responders following TNFi therapy. Furthermore, recovery of *Faecalibacterium*  
423 *prausnitzii* in patients with ulcerative colitis after relapse was associated with maintenance of remission  
424<sup>74</sup>. Another study demonstrated that treatment of infliximab completely restored *Faecalibacterium*  
425 *prausnitzii* concentrations from zero to  $1.4 \times 10^{10}$  bacteria/mL within few days<sup>52</sup>.

426

427 Another important microbe, *Prevotella copri*, was observed to be enriched to levels closely matched to  
428 that of healthy controls following TNFi treatment. Abundance of *Prevotella copri* has previously been  
429 shown to be enriched in untreated new onset RA patients yet depleted in chronic RA cases, patients  
430 with psoriatic arthritis and healthy controls<sup>52</sup>. Colonisation of SKG mice with *Prevotella copri*-dominated  
431 microbiota from RA patients exhibited increased number of Th17 cells in the large intestine<sup>75</sup>. HLA-DR-  
432 presented peptides (T cell epitopes) from *Prevotella copri* were recently found to stimulate Th1  
433 responses in 42% of new onset RA cases, with subgroups of RA patients demonstrating differential IgG  
434 or IgA immune reactivity, providing evidence that *Prevotella copri* is immune-relevant in RA  
435 pathogenesis<sup>76</sup>. Additionally, the presence of the *HLA-DRB1* risk allele, which influences disease  
436 severity, in RA patients was found to be inversely correlated with *Prevotella copri* abundance<sup>52,77-79</sup>. A  
437 recent study of Chinese AS patients revealed enrichment of *Prevotella copri*, as well as *Prevotella*  
438 *melaninogenica* and *Prevotella* sp. C561<sup>15,80</sup>. Contrasting these results, in the current study we observed  
439 depletion of *Prevotella copri* in untreated AS cases, which was restored to the healthy control levels in  
440 TNFi-treated patients. These seemingly conflicting reports of *Prevotella copri* abundance may be  
441 explained by the large degree of intraspecific genetic diversity of *Prevotella copri* strains, with strain  
442 variation adding an additional layer of complexity for predicting the function of *Prevotella copri* in the  
443 gut. The *Prevotella* genus also contains members that may be beneficial, and which do not function as  
444 pathobionts<sup>77-79</sup>, with observed enrichment in healthy individuals. Taken together, our results which  
445 demonstrate a modulation of *Prevotella copri* abundance in TNFi-treated cases is a noteworthy  
446 observation, however without a stronger grasp of the strain-level genome variation within this taxon  
447 and their prevalence across our cohort, attempts to therapeutically modulate and predict the effects of  
448 *Prevotella copri* remains a significant challenge<sup>81</sup>.

449

450 *Klebsiella pneumoniae* has also been suggested to play a significant role in AS pathogenesis<sup>82</sup>, although  
451 this remains controversial<sup>83</sup>. *Klebsiella pneumoniae* notably produces pullulanase, a starch-debranching  
452 enzyme which enables the degradation of starch into simple sugars<sup>84</sup>. The apparent arthritogenic  
453 effects of dietary starch in AS are based on the concept that the growth of *Klebsiella sp.* are favoured by  
454 these diets and drive AS pathogenesis<sup>85,86</sup>. Consequently, low starch diets have been promoted and are  
455 frequently followed by patients<sup>86</sup>, although there is no published evidence to date as to their efficacy in  
456 positively affecting AS disease course. Here, we actually observed a depletion of this microbe in  
457 untreated cases relative to healthy controls, whereas TNFi-treated cases showed a restoration of this  
458 bacterium. Furthermore, our metagenome sequencing data showed an inverse correlation between  
459 *Klebsiella pneumoniae* relative abundance and the overall starch degradation metabolic pathway ( $P =$   
460  $0.014$ ;  $R^2 = -0.043$ ) (Supplementary Table 5). This pathway not only includes the pullulanase-mediated  
461 starch de-branching reaction, but also further downstream reactions including the transport and  
462 catabolism of maltodextrins. These findings do not support an association between *Klebsiella*  
463 *pneumoniae* and AS pathophysiology, although the role of dietary and/or resistant starches on the gut  
464 microbiota and AS warrants further investigation.

465

466 MetaCyc pathway analysis revealed depletion of the aromatic and branched-chain amino acid  
467 biosynthesis pathways in untreated AS cases, which are responsible for production of four of the nine  
468 essential amino acids in humans (leucine, isoleucine, valine and phenylalanine) (Supplementary Table 7).  
469 Vitamin B6 is an essential co-factor for branched-chain amino acid transaminase, the last step of  
470 branched-chain amino acid synthesis, and was found to be depleted in RA cases, as previously  
471 mentioned. Therefore, in the current study we not only observed a depletion of genes encoding the  
472 branched-chain amino acid biosynthesis pathway, but also for the enzyme which synthesises an  
473 important co-factor in the process.

474

#### 475 **Enrichment of potentially arthritogenic bacterial peptides**

476 Pathogenic bacteria have long been hypothesised as an immunological triggers of AS pathogenesis. In  
477 the current study, patients with AS not only demonstrated an enrichment of bacterial peptides matching  
478 HLA-B27 epitopes (Table 1), but the diversity of these peptides was greater overall (Figure 4A). These  
479 data provide supporting evidence for the molecular mimicry hypothesis for which bacterial-derived  
480 peptides may stimulate AS via cross-activation of autoreactive T- or B- cells, thus leading to  
481 autoimmunity. This hypothesis does not however explain the increase in HLA-B27 epitopes amongst AS  
482 cases, which could be explained by effects of non-HLA genetic factors, or AS-associated environmental  
483 factors. An alternate hypothesis is that their excess carriage is caused by a deficiency in the ability of  
484 HLA-B27 to effectively control their presence, consistent with evidence of increased bacterial migration  
485 across the gut mucosa in AS <sup>87</sup>. Interestingly, the modulation of the gut microbiome caused by TNFi  
486 treatment restored the elevated abundance and diversity of peptides observed in untreated cases to  
487 levels which were more closely matched to healthy controls (Figure 4B). Further research will be  
488 required to resolve these alternate hypotheses.

489

#### 490 **Effect of host genotype upon the microbiome**

491 Very recently, it was demonstrated that HLA-B27 is associated with a significant shift in the microbiome  
492 in healthy individuals <sup>47</sup>. Furthermore, in mouse models, MHC polymorphisms were demonstrated to  
493 contribute to an individual's microbial composition, thus influencing health <sup>88</sup>. Our investigation  
494 revealed an additional AS-associated SNP, rs11249215 in *RUNX3* <sup>45,46</sup>, which was also correlated with a  
495 significant shift in bacterial composition (Figure 3A). This result was replicated in a confirmatory dataset  
496 of healthy Caucasian individuals (Figure 3B). In addition to potential roles in autoimmune diseases,  
497 variants in *RUNX3* have been associated with the intestinal inflammatory disorder celiac disease <sup>89</sup>, and

498 *RUNX3*-knockout mice spontaneously develop IBD <sup>90</sup>. It is therefore tempting to hypothesise that the  
499 role of *RUNX3* in disease pathogenesis is, at least in part, caused by perturbation of the gut microbiome.  
500 Interestingly, subjects homozygous for rs11249215 exhibited a significant decrease in the abundance of  
501 the polyamine biosynthesis superpathway (Figure 3D). The intestinal tract contains high levels of  
502 polyamines which are critical for cell growth and can stimulate the production of junction proteins  
503 which are crucial for regulating paracellular permeability and reinforcing epithelial barrier function.  
504 Shifts in host and microbial polyamine metabolism may also alter the cytokine environment and induce  
505 cellular processes in both acute and chronic inflammatory settings <sup>49</sup>. A potential relationship between  
506 *RUNX3*, microbial composition, intestinal polyamine levels and epithelial permeability and/or the  
507 cytokine environment warrants further investigation.  
508

509 **CONCLUSION**

510 In this study we confirm that AS is characterised by gut dysbiosis and identify key indicator species,  
511 several of which are shared with IBD. This dysbiosis is associated with functional differences in the  
512 microbiome involving known inflammation-related pathways. We demonstrate that treatment with  
513 TNFi, which is highly effective in suppressing the clinical manifestations of AS, normalises the gut  
514 microbiome, and its functional properties, in AS cases. We further demonstrate that the AS gut  
515 microbiome is enriched for bacterial peptides that have previously been shown to be presented by HLA-  
516 B27, and that this enrichment is also normalised by TNFi treatment. The impact of the host's genotype  
517 upon microbiome composition was also highlighted, with an AS- and IBD-associated SNP in *RUNX3*  
518 correlating with a shift in microbiome composition. These findings are consistent with disease models in  
519 which AS pathogenesis is driven by interactions between a genetically primed host immune system, and  
520 the gut microbiome, and point to potential therapeutic and/or preventative approaches for the disease.

521

522 **AUTHOR CONTRIBUTIONS**

523 Study design was performed by HX, JY and MAB. Subject recruitment and sample collection was  
524 performed by JY, JS, TL, LZ, XW and JZ. Metagenomic analysis was performed by PRS, and bacterial  
525 epitope studies by JY, FH and MW. The manuscript was prepared by PRS, MM, MAB and HX.

526

527 **ACKNOWLEDGEMENTS**

528 HX is supported by National Science Foundation of China (Grant 81302578) and China Ministry of  
529 Science and technology (973 Program of China 2014CB541800). MAB is funded by a National Health and  
530 Medical Research Council Senior Principal Research Fellowship (APP1024879).

531



532 REFERENCES

- 533 1. Wang, R. & Ward, M.M. Epidemiology of axial spondyloarthritis: an update. *Current opinion in*  
534 *rheumatology* **30**, 137-143 (2018).
- 535 2. Braun, J., *et al.* Prevalence of spondylarthropathies in HLA-B27 positive and negative blood  
536 donors. *Arthritis Rheum* **41**, 58-67 (1998).
- 537 3. Brown, M.A., *et al.* Ankylosing spondylitis in West Africans--evidence for a non-HLA-B27  
538 protective effect. *Ann Rheum Dis* **56**, 68-70 (1997).
- 539 4. Pedersen, O.B., *et al.* Ankylosing spondylitis in Danish and Norwegian twins: occurrence and the  
540 relative importance of genetic vs. environmental effectors in disease causation. *Scand J*  
541 *Rheumatol* **37**, 120-126 (2008).
- 542 5. Brown, M.A., *et al.* Susceptibility to ankylosing spondylitis in twins: the role of genes, HLA, and  
543 the environment. *Arthritis Rheum* **40**, 1823-1828 (1997).
- 544 6. Ranganathan, V., Gracey, E., Brown, M.A., Inman, R.D. & Haroon, N. Pathogenesis of ankylosing  
545 spondylitis - recent advances and future directions. *Nature reviews. Rheumatology* **13**, 359-367  
546 (2017).
- 547 7. Mielants, H., *et al.* The evolution of spondyloarthropathies in relation to gut histology. II.  
548 Histological aspects. *J Rheumatol* **22**, 2273-2278 (1995).
- 549 8. Ellinghaus, D., *et al.* Analysis of five chronic inflammatory diseases identifies 27 new associations  
550 and highlights disease-specific patterns at shared loci. *Nature genetics* **48**, 510-518 (2016).
- 551 9. Thjodleifsson, B., Geirsson, A.J., Bjornsson, S. & Bjarnason, I. A common genetic background for  
552 inflammatory bowel disease and ankylosing spondylitis: a genealogic study in Iceland. *Arthritis*  
553 *Rheum* **56**, 2633-2639 (2007).
- 554 10. Parkes, M., Cortes, A., van Heel, D.A. & Brown, M.A. Genetic insights into common pathways  
555 and complex relationships among immune-mediated diseases. *Nature reviews. Genetics* **14**, 661-  
556 673 (2013).
- 557 11. Li, Z., *et al.* Epigenetic and gene expression analysis of ankylosing spondylitis-associated loci  
558 implicate immune cells and the gut in the disease pathogenesis. *Genes and immunity* **18**, 135-  
559 143 (2017).
- 560 12. Taurog, J.D., *et al.* The germfree state prevents development of gut and joint inflammatory  
561 disease in HLA-B27 transgenic rats. *The Journal of experimental medicine* **180**, 2359-2364 (1994).
- 562 13. Rehaume, L.M., *et al.* ZAP-70 genotype disrupts the relationship between microbiota and host,  
563 leading to spondyloarthritis and ileitis in SKG mice. *Arthritis & rheumatology* **66**, 2780-2792  
564 (2014).
- 565 14. Costello, M.E., *et al.* Brief Report: Intestinal Dysbiosis in Ankylosing Spondylitis. *Arthritis &*  
566 *rheumatology* **67**, 686-691 (2015).
- 567 15. Wen, C., *et al.* Quantitative metagenomics reveals unique gut microbiome biomarkers in  
568 ankylosing spondylitis. *Genome biology* **18**, 142 (2017).
- 569 16. Breban, M., *et al.* Faecal microbiota study reveals specific dysbiosis in spondyloarthritis. *Ann*  
570 *Rheum Dis* **76**, 1614-1622 (2017).
- 571 17. Tito, R.Y., *et al.* Brief Report: Dialister as a Microbial Marker of Disease Activity in  
572 Spondyloarthritis. *Arthritis & rheumatology* **69**, 114-121 (2017).
- 573 18. Bazin, T., *et al.* Microbiota Composition May Predict Anti-Tnf Alpha Response in  
574 Spondyloarthritis Patients: an Exploratory Study. *Scientific reports* **8**, 5446 (2018).
- 575 19. Schittenhelm, R.B., Sian, T.C., Wilmann, P.G., Dudek, N.L. & Purcell, A.W. Revisiting the  
576 arthritogenic peptide theory: quantitative not qualitative changes in the peptide repertoire of  
577 HLA-B27 allotypes. *Arthritis & rheumatology* **67**, 702-713 (2015).

- 578 20. Linden, S.V.D., Valkenburg, H.A. & Cats, A. Evaluation of diagnostic criteria for ankylosing  
579 spondylitis. *Arthritis & rheumatology* **27**, 361-368 (1984).
- 580 21. Garrett, S., *et al.* A new approach to defining disease status in ankylosing spondylitis: the Bath  
581 Ankylosing Spondylitis Disease Activity Index. *J Rheumatol* **21**, 2286-2291 (1994).
- 582 22. Calin, A., *et al.* A new approach to defining functional ability in ankylosing spondylitis: the  
583 development of the Bath Ankylosing Spondylitis Functional Index. *J Rheumatol* **21**, 2281-2285  
584 (1994).
- 585 23. Das, S., *et al.* Next-generation genotype imputation service and methods. *Nature genetics* **48**,  
586 1284 (2016).
- 587 24. Jia, X., *et al.* Imputing amino acid polymorphisms in human leukocyte antigens. *PloS one* **8**,  
588 e64683 (2013).
- 589 25. Rentería, M.E., Cortes, A. & Medland, S.E. Using PLINK for genome-wide association studies  
590 (GWAS) and data analysis. in *Genome-Wide Association Studies and Genomic Prediction* 193-213  
591 (Springer, 2013).
- 592 26. Andrews, S. FastQC: a quality control tool for high throughput sequence data. (2010).
- 593 27. Zhang, J., Kobert, K., Flouri, T. & Stamatakis, A. PEAR: a fast and accurate Illumina Paired-End  
594 reAd mergeR. *Bioinformatics* **30**, 614-620 (2013).
- 595 28. Bolger, A.M., Lohse, M. & Usadel, B. Trimmomatic: a flexible trimmer for Illumina sequence  
596 data. *Bioinformatics* **30**, 2114-2120 (2014).
- 597 29. Langmead, B. & Salzberg, S.L. Fast gapped-read alignment with Bowtie 2. *Nature methods* **9**, 357  
598 (2012).
- 599 30. Li, H. seqtk Toolkit for processing sequences in FASTA/Q formats. (GitHub, 2012).
- 600 31. Truong, D.T., *et al.* MetaPhlan2 for enhanced metagenomic taxonomic profiling. *Nature*  
601 *methods* **12**, 902 (2015).
- 602 32. Scholz, M., *et al.* Strain-level microbial epidemiology and population genomics from shotgun  
603 metagenomics. *Nature methods* **13**, 435 (2016).
- 604 33. Abubucker, S., *et al.* Metabolic reconstruction for metagenomic data and its application to the  
605 human microbiome. *PLoS computational biology* **8**, e1002358 (2012).
- 606 34. Altschul, S.F., Gish, W., Miller, W., Myers, E.W. & Lipman, D.J. Basic local alignment search tool.  
607 *Journal of molecular biology* **215**, 403-410 (1990).
- 608 35. Vita, R., *et al.* The immune epitope database (IEDB) 3.0. *Nucleic acids research* **43**, D405-D412  
609 (2014).
- 610 36. Kim, Y., *et al.* Immune epitope database analysis resource. *Nucleic acids research* **40**, W525-  
611 W530 (2012).
- 612 37. Schittenhelm, R.B., Sian, T.C., Wilmann, P.G., Dudek, N.L. & Purcell, A.W. Revisiting the  
613 arthritogenic peptide theory: quantitative not qualitative changes in the peptide repertoire of  
614 HLA-B27 allotypes. *Arthritis & rheumatology* **67**, 702-713 (2015).
- 615 38. Lê Cao, K.-A., *et al.* MixMC: a multivariate statistical framework to gain insight into microbial  
616 communities. *PloS one* **11**, e0160169 (2016).
- 617 39. Dixon, P. VEGAN, a package of R functions for community ecology. *Journal of Vegetation Science*  
618 **14**, 927-930 (2003).
- 619 40. Morgan, X.C., *et al.* Dysfunction of the intestinal microbiome in inflammatory bowel disease and  
620 treatment. *Genome biology* **13**, R79 (2012).
- 621 41. Ihaka, R. & Gentleman, R. R: a language for data analysis and graphics. *Journal of computational*  
622 *and graphical statistics* **5**, 299-314 (1996).
- 623 42. Forbes, J.D., Van Domselaar, G. & Bernstein, C.N. The gut microbiota in immune-mediated  
624 inflammatory diseases. *Frontiers in microbiology* **7**, 1081 (2016).

- 625 43. Kenna, T.J. & Brown, M.A. Immunopathogenesis of ankylosing spondylitis. *Int J Clin Rheumatol* **8**,  
626 265-274 (2013).
- 627 44. Rosenbaum, J.T., *et al.* Does the microbiome play a causal role in spondyloarthritis? *Clinical*  
628 *rheumatology* **33**, 763-767 (2014).
- 629 45. Evans, D.M., *et al.* Interaction between ERAP1 and HLA-B27 in ankylosing spondylitis implicates  
630 peptide handling in the mechanism for HLA-B27 in disease susceptibility. *Nature genetics* **43**,  
631 761 (2011).
- 632 46. International Genetics of Ankylosing Spondylitis, C., *et al.* Identification of multiple risk variants  
633 for ankylosing spondylitis through high-density genotyping of immune-related loci. *Nature*  
634 *genetics* **45**, 730-738 (2013).
- 635 47. Asquith, M., *et al.* HLA alleles associated with risk of ankylosing spondylitis and rheumatoid  
636 arthritis influence the gut microbiome. *bioRxiv*, 517813 (2019).
- 637 48. Varani, K., *et al.* The role of adenosine receptors in rheumatoid arthritis. *Autoimmunity reviews*  
638 **10**, 61-64 (2010).
- 639 49. Rooks, M.G. & Garrett, W.S. Gut microbiota, metabolites and host immunity. *Nature Reviews*  
640 *Immunology* **16**, 341 (2016).
- 641 50. Rothschild, D., *et al.* Environment dominates over host genetics in shaping human gut  
642 microbiota. *Nature* **555**, 210 (2018).
- 643 51. Gevers, D., *et al.* The treatment-naive microbiome in new-onset Crohn's disease. *Cell host &*  
644 *microbe* **15**, 382-392 (2014).
- 645 52. Scher, J.U., *et al.* Expansion of intestinal *Prevotella copri* correlates with enhanced susceptibility  
646 to arthritis. *elife* **2**(2013).
- 647 53. Joossens, M., *et al.* Dysbiosis of the faecal microbiota in patients with Crohn's disease and their  
648 unaffected relatives. *Gut* **60**, 631-637 (2011).
- 649 54. Schirmer, M., *et al.* Dynamics of metatranscription in the inflammatory bowel disease gut  
650 microbiome. *Nat Microbiol* **3**, 337-346 (2018).
- 651 55. Magnusson, M.K., *et al.* Anti-TNF therapy response in patients with ulcerative colitis is  
652 associated with colonic antimicrobial peptide expression and microbiota composition. *Journal of*  
653 *Crohn's and Colitis* **10**, 943-952 (2016).
- 654 56. De Preter, V., *et al.* Faecal metabolite profiling identifies medium-chain fatty acids as  
655 discriminating compounds in IBD. *Gut*, gvtjnl-2013-306423 (2014).
- 656 57. Le Gall, G., *et al.* Metabolomics of fecal extracts detects altered metabolic activity of gut  
657 microbiota in ulcerative colitis and irritable bowel syndrome. *Journal of proteome research* **10**,  
658 4208-4218 (2011).
- 659 58. Marchesi, J.R., *et al.* Rapid and noninvasive metabonomic characterization of inflammatory  
660 bowel disease. *Journal of proteome research* **6**, 546-551 (2007).
- 661 59. Machiels, K., *et al.* A decrease of the butyrate-producing species *Roseburia hominis* and  
662 *Faecalibacterium prausnitzii* defines dysbiosis in patients with ulcerative colitis. *Gut* **63**, 1275-  
663 1283 (2014).
- 664 60. Stoll, M.L., *et al.* Altered microbiota associated with abnormal humoral immune responses to  
665 commensal organisms in enthesitis-related arthritis. *Arthritis Res Ther* **16**, 486 (2014).
- 666 61. Arpaia, N., *et al.* Metabolites produced by commensal bacteria promote peripheral regulatory T-  
667 cell generation. *Nature* **504**, 451-455 (2013).
- 668 62. Sokol, H., *et al.* *Faecalibacterium prausnitzii* is an anti-inflammatory commensal bacterium  
669 identified by gut microbiota analysis of Crohn disease patients. *Proc Natl Acad Sci U S A* **105**,  
670 16731-16736 (2008).
- 671 63. Neis, E., Dejong, C. & Rensen, S.J.N. The role of microbial amino acid metabolism in host  
672 metabolism. *7*, 2930-2946 (2015).

- 673 64. Rucker, R.B., Suttie, J.W. & McCormick, D.B. *Handbook of vitamins*, (CRC Press, 2001).
- 674 65. Magnúsdóttir, S., Ravcheev, D., de Crécy-Lagard, V. & Thiele, I. Systematic genome assessment  
675 of B-vitamin biosynthesis suggests co-operation among gut microbes. *Frontiers in genetics* **6**,  
676 148 (2015).
- 677 66. Woolf, K. & Manore, M.M. Elevated plasma homocysteine and low vitamin B-6 status in  
678 nonsupplementing older women with rheumatoid arthritis. *Journal of the American Dietetic*  
679 *Association* **108**, 443-453 (2008).
- 680 67. Schumacher, H., Bernhart, F. & György, P. Vitamin B6 levels in rheumatoid arthritis: effect of  
681 treatment. *The American journal of clinical nutrition* **28**, 1200-1203 (1975).
- 682 68. Chiang, E.-P.I., Bagley, P.J., Selhub, J., Nadeau, M. & Roubenoff, R. Abnormal vitamin B6 status is  
683 associated with severity of symptoms in patients with rheumatoid arthritis. *The American*  
684 *journal of medicine* **114**, 283-287 (2003).
- 685 69. Chiang, E.-P.I., Selhub, J., Bagley, P.J., Dallal, G. & Roubenoff, R. Pyridoxine supplementation  
686 corrects vitamin B6 deficiency but does not improve inflammation in patients with rheumatoid  
687 arthritis. *Arthritis research & therapy* **7**, R1404 (2005).
- 688 70. O'connor, Á. An overview of the role of diet in the treatment of rheumatoid arthritis. *Nutrition*  
689 *bulletin* **39**, 74-88 (2014).
- 690 71. Selhub, J., *et al.* Dietary vitamin B6 intake modulates colonic inflammation in the IL10<sup>-/-</sup> model  
691 of inflammatory bowel disease. *The Journal of nutritional biochemistry* **24**, 2138-2143 (2013).
- 692 72. Zhang, X., *et al.* The oral and gut microbiomes are perturbed in rheumatoid arthritis and partly  
693 normalized after treatment. *Nature medicine* **21**, 895 (2015).
- 694 73. Bazin, T., *et al.* Microbiota Composition May Predict Anti-Tnf Alpha Response in  
695 Spondyloarthritis Patients: an Exploratory Study. *Scientific reports* **8**, 5446 (2018).
- 696 74. Varela, E., *et al.* Colonisation by Faecalibacterium prausnitzii and maintenance of clinical  
697 remission in patients with ulcerative colitis. *Alimentary pharmacology & therapeutics* **38**, 151-  
698 161 (2013).
- 699 75. Maeda, Y., *et al.* Dysbiosis contributes to arthritis development via activation of autoreactive T  
700 cells in the intestine. *Arthritis & rheumatology* **68**, 2646-2661 (2016).
- 701 76. Pianta, A., *et al.* Evidence of the immune relevance of Prevotella copri, a gut microbe, in patients  
702 with rheumatoid arthritis. *Arthritis & rheumatology* **69**, 964-975 (2017).
- 703 77. Glick-Bauer, M. & Yeh, M.-C. The health advantage of a vegan diet: exploring the gut microbiota  
704 connection. *Nutrients* **6**, 4822-4838 (2014).
- 705 78. Kovatcheva-Datchary, P., *et al.* Dietary fiber-induced improvement in glucose metabolism is  
706 associated with increased abundance of Prevotella. *Cell metabolism* **22**, 971-982 (2015).
- 707 79. Kim, D. & Kim, W.U. can Prevotella copri be a causative pathobiont in rheumatoid arthritis?  
708 *Arthritis & rheumatology* **68**, 2565-2567 (2016).
- 709 80. Wen, C., *et al.* Quantitative metagenomics reveals unique gut microbiome biomarkers in  
710 ankylosing spondylitis. *Genome biology* **18**, 142 (2017).
- 711 81. Ley, R.E. Gut microbiota in 2015: Prevotella in the gut: choose carefully. *Nature Reviews*  
712 *Gastroenterology & Hepatology* **13**, 69-70 (2016).
- 713 82. Ebringer, R., Cooke, D., Cawdell, D.R., Cowling, P. & Ebringer, A. Ankylosing spondylitis: klebsiella  
714 and HL-A B27. *Rheumatology and rehabilitation* **16**, 190-196 (1977).
- 715 83. Stone, M., *et al.* Comparative immune responses to candidate arthritogenic bacteria do not  
716 confirm a dominant role for Klebsiella pneumonia in the pathogenesis of familial ankylosing  
717 spondylitis. *Rheumatology* **43**, 148-155 (2003).
- 718 84. Pugsley, A.P., Chapon, C. & Schwartz, M. Extracellular pullulanase of Klebsiella pneumoniae is a  
719 lipoprotein. *Journal of bacteriology* **166**, 1083-1088 (1986).

- 720 85. Ebringer, A. & Wilson, C. The use of a low starch diet in the treatment of patients suffering from  
721 ankylosing spondylitis. *Clinical rheumatology* **15**, 62-66 (1996).
- 722 86. Rashid, T., Wilson, C. & Ebringer, A. The link between ankylosing spondylitis, Crohn's disease,  
723 Klebsiella, and starch consumption. *Clin Dev Immunol* **2013**, 872632 (2013).
- 724 87. Ciccia, F., *et al.* Dysbiosis and zonulin upregulation alter gut epithelial and vascular barriers in  
725 patients with ankylosing spondylitis. *Ann Rheum Dis* **76**, 1123-1132 (2017).
- 726 88. Kubinak, J.L., *et al.* MHC variation sculpts individualized microbial communities that control  
727 susceptibility to enteric infection. *Nature communications* **6**, 8642 (2015).
- 728 89. Dubois, P.C., *et al.* Multiple common variants for celiac disease influencing immune gene  
729 expression. *Nature genetics* **42**, 295-302 (2010).
- 730 90. Brenner, O., *et al.* Loss of Runx3 function in leukocytes is associated with spontaneously  
731 developed colitis and gastric mucosal hyperplasia. *Proceedings of the National Academy of*  
732 *Sciences of the United States of America* **101**, 16016-16021 (2004).
- 733



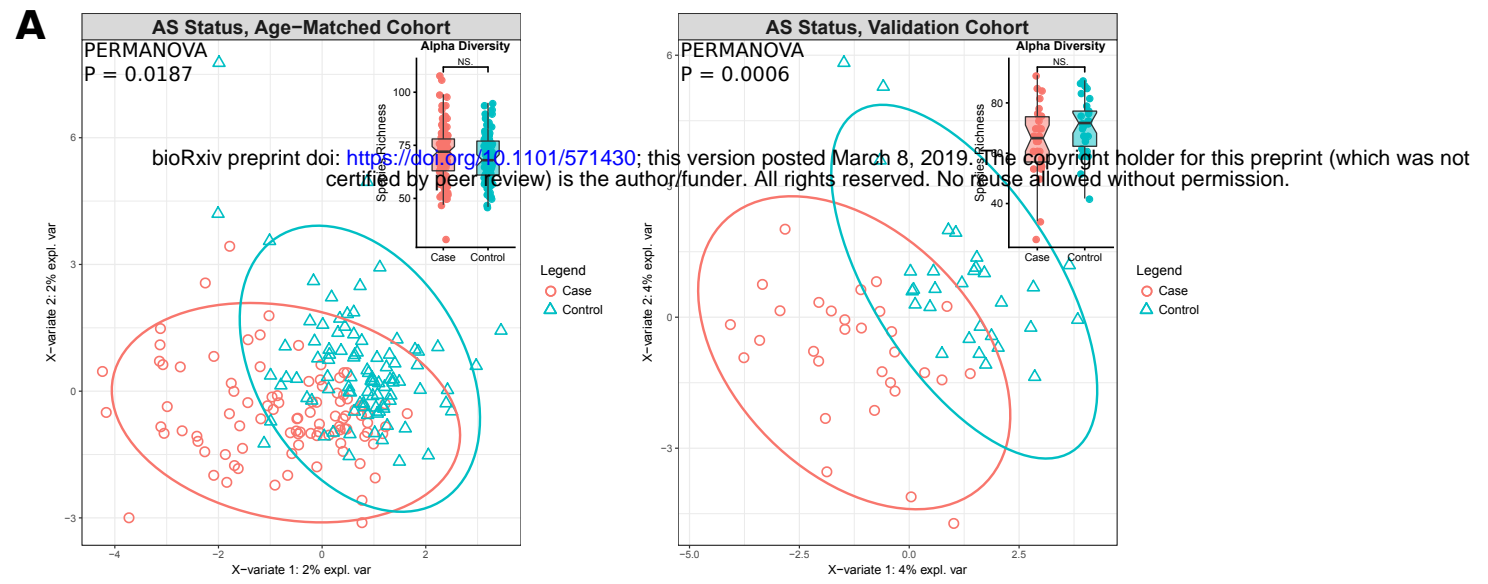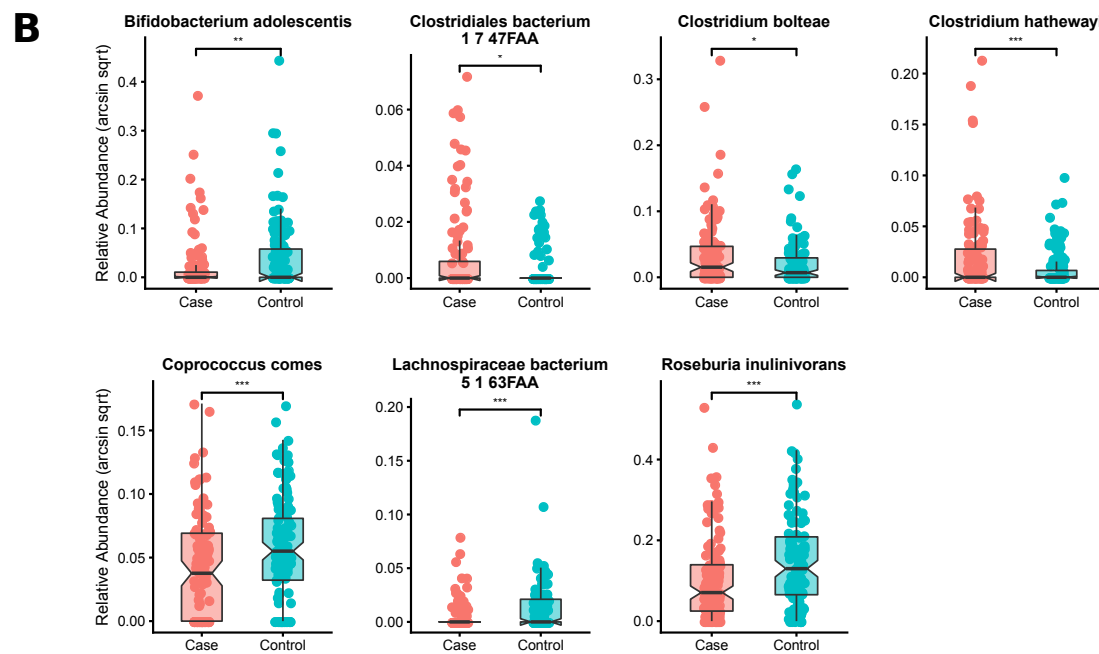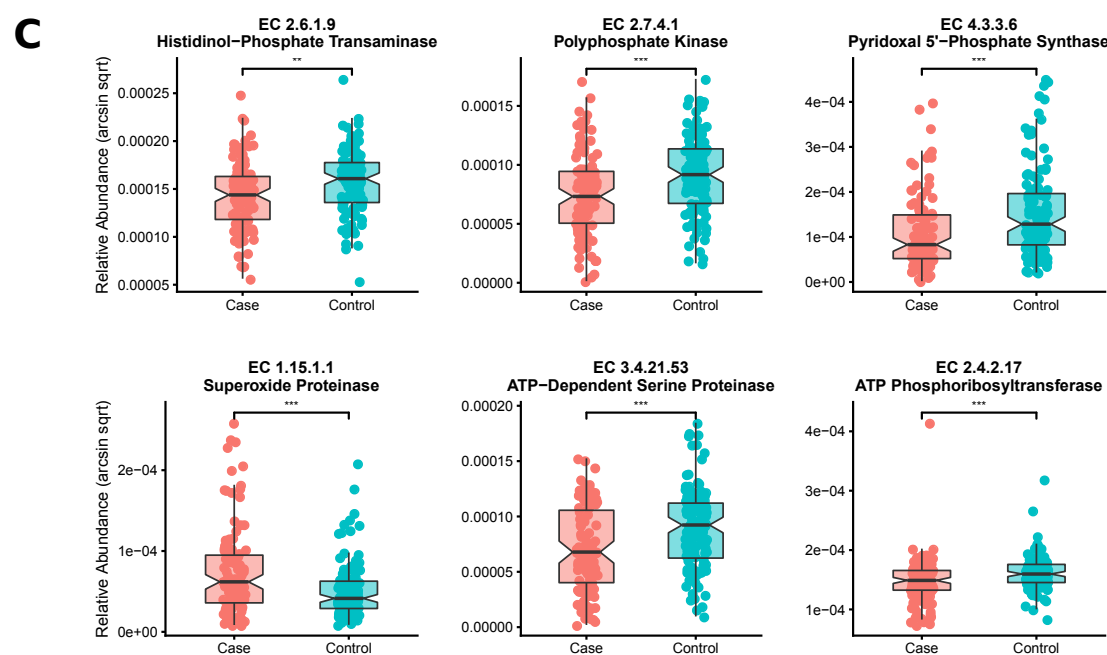

**Figure 1: Taxonomic and functional dysbiosis observed in AS cases relative to healthy controls.**  
**A.** Alpha and beta diversity analysis. sPLSDA and PERMANOVA revealed community-level differences in taxonomic composition. **B.** Commonly-differentiated bacterial species from the discovery and validation cohorts. **C.** Commonly-differentiated KEGG Orthogroups from the discovery and validation cohorts. Bacterial species and KEGG Orthogroups exhibiting significant results according to multivariate linear modelling and Wilcoxon rank-sum tests are shown.

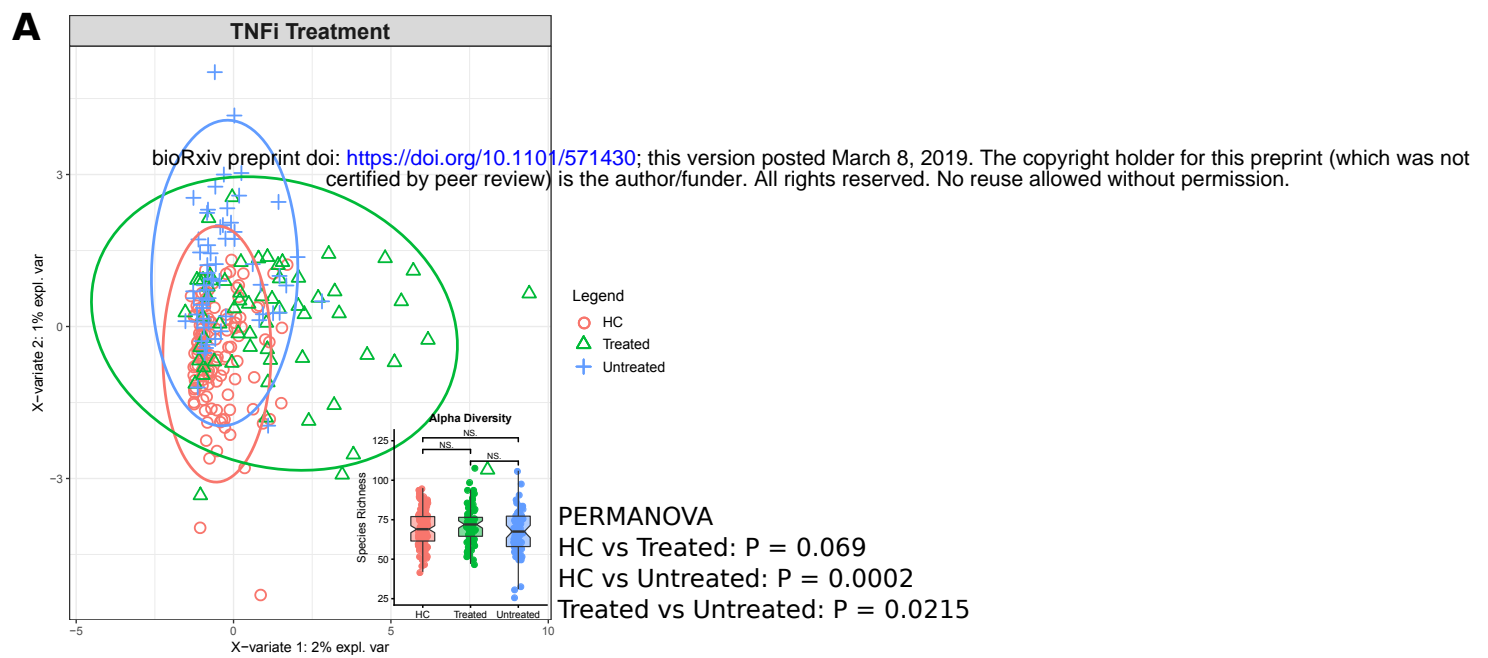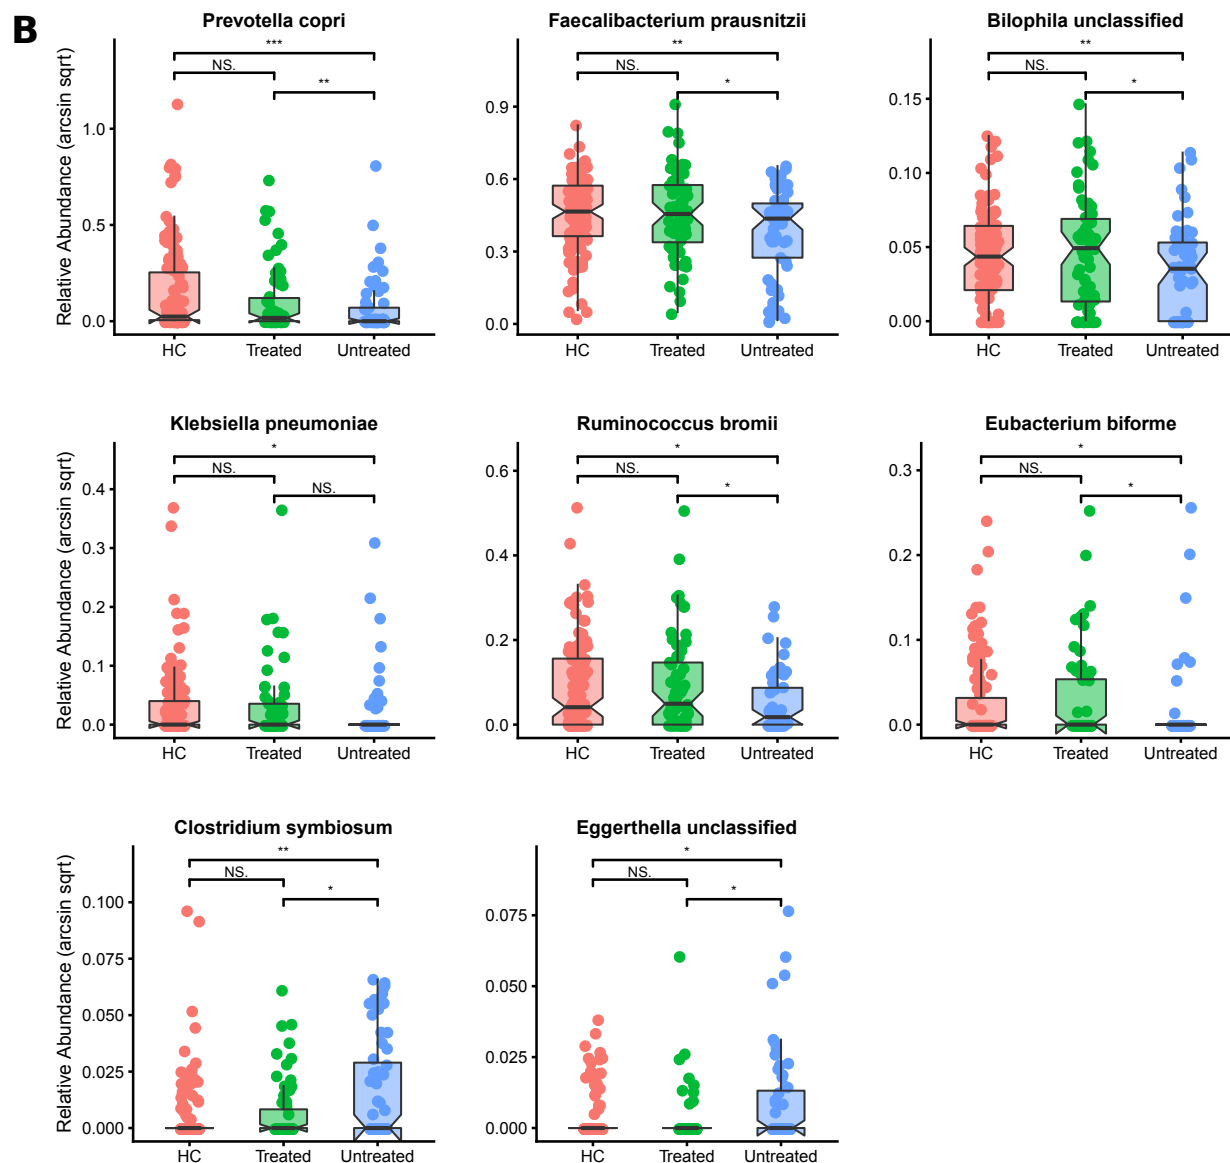

**Figure 2:** Effect of TNF $\alpha$  therapy upon the microbiome. **A.** Alpha and beta diversity analysis. sPLSDA and PERMANOVA revealed community-level differences in taxonomic composition. **B.** Bacterial species modulated by the effects of TNF $\alpha$  treatment. Bacterial species exhibiting significant results according to multivariate linear modelling and Wilcoxon rank-sum tests are shown.

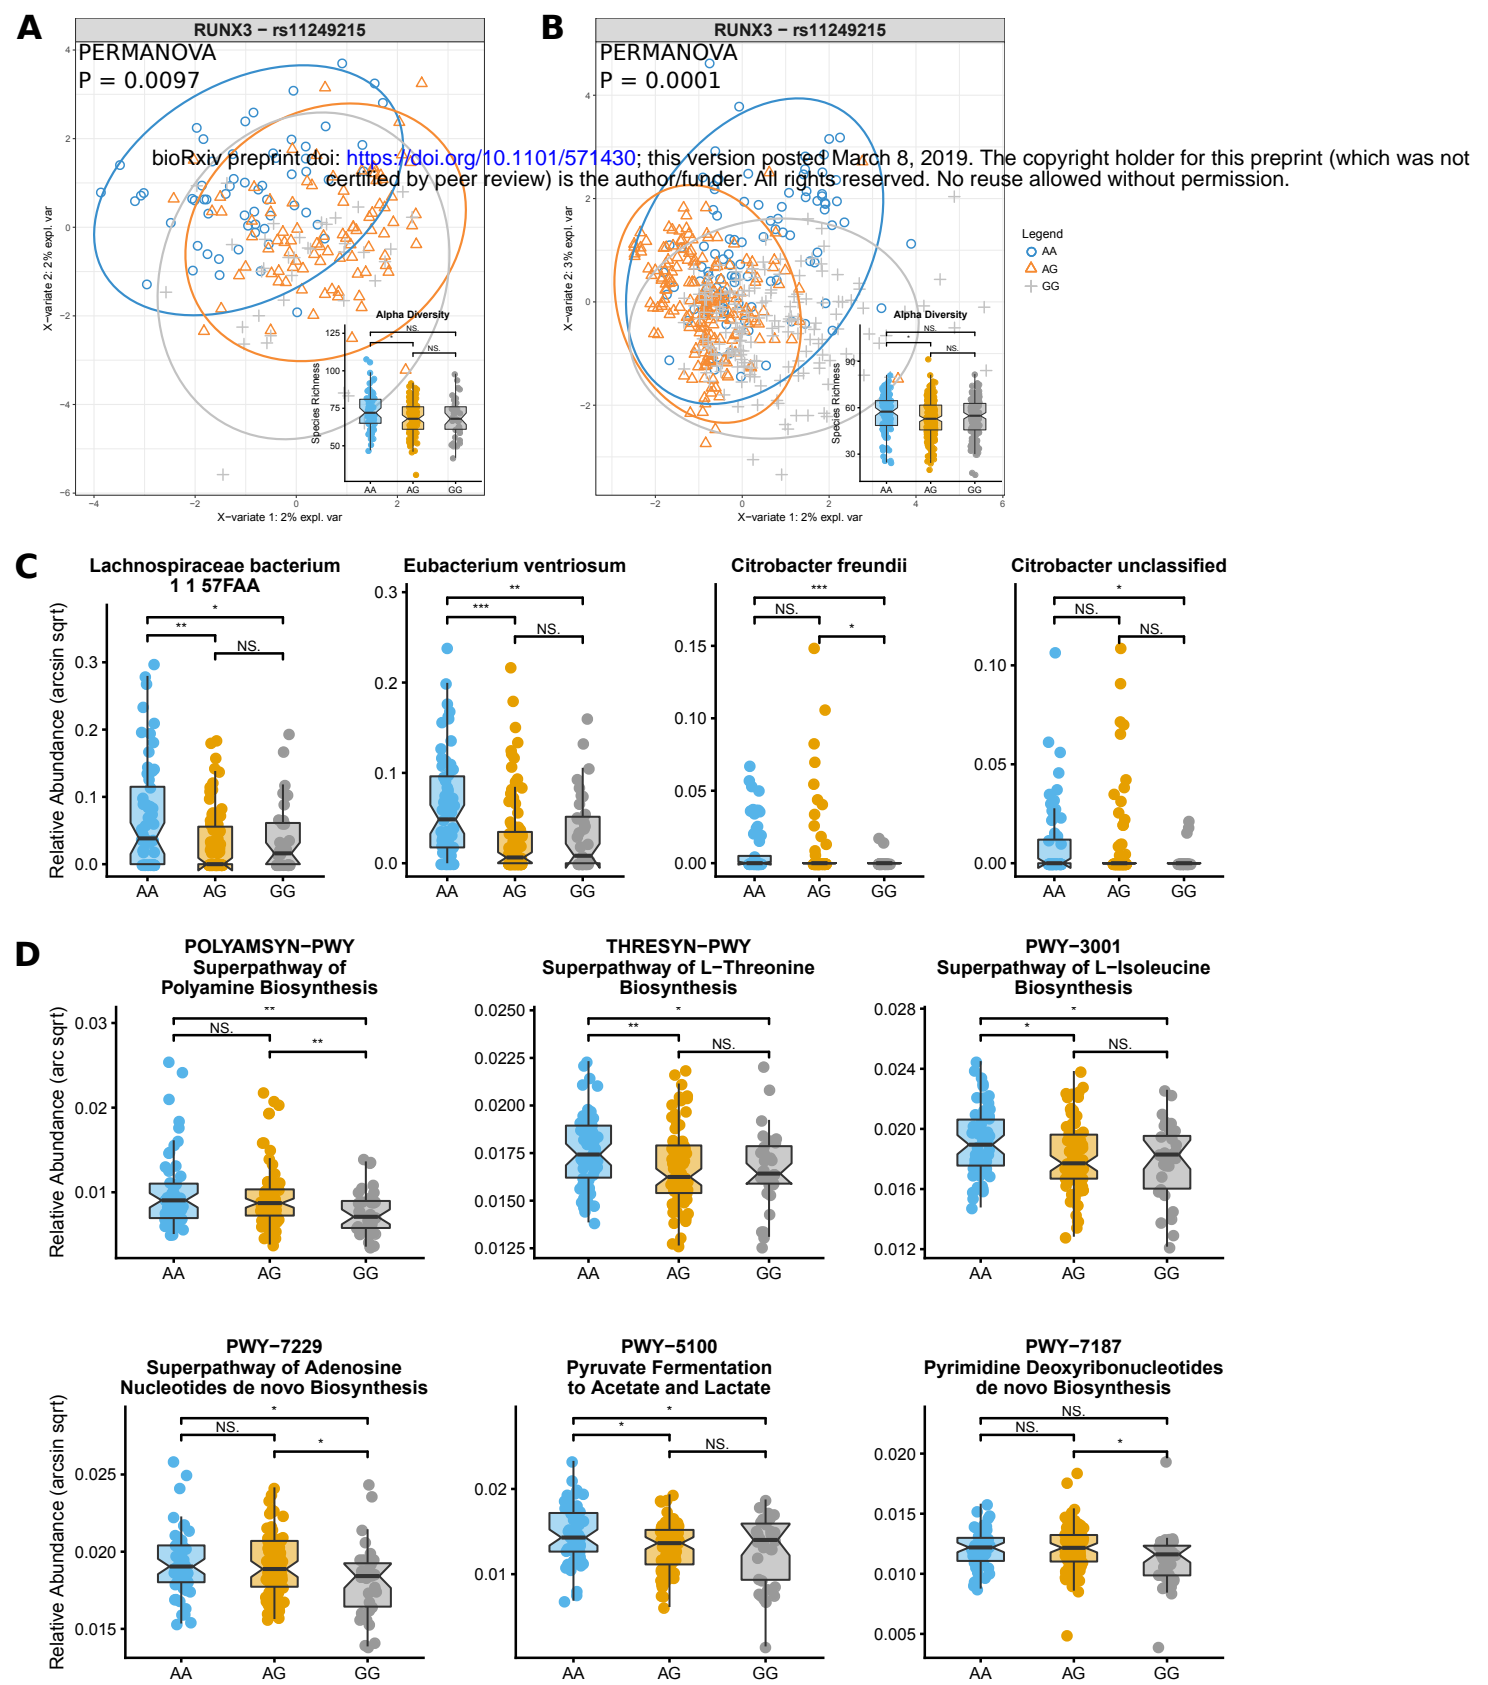

**Figure 3:** Effect of RUNX3 variants upon the microbiome. **A.** sPLSDA, alpha diversity and PERMANOVA community-level taxonomic analysis of the current study. **B.** sPLSDA, alpha diversity and PERMANOVA community-level taxonomic analysis of a recent 16S metabarcode study of healthy individuals. **C.** Modulated bacterial species according to significant results from multivariate linear modelling and Wilcoxon rank-sum testing. **D.** Modulated MetaCyc metabolic pathways, according to significant results from multivariate linear modelling and Wilcoxon rank-sum testing.



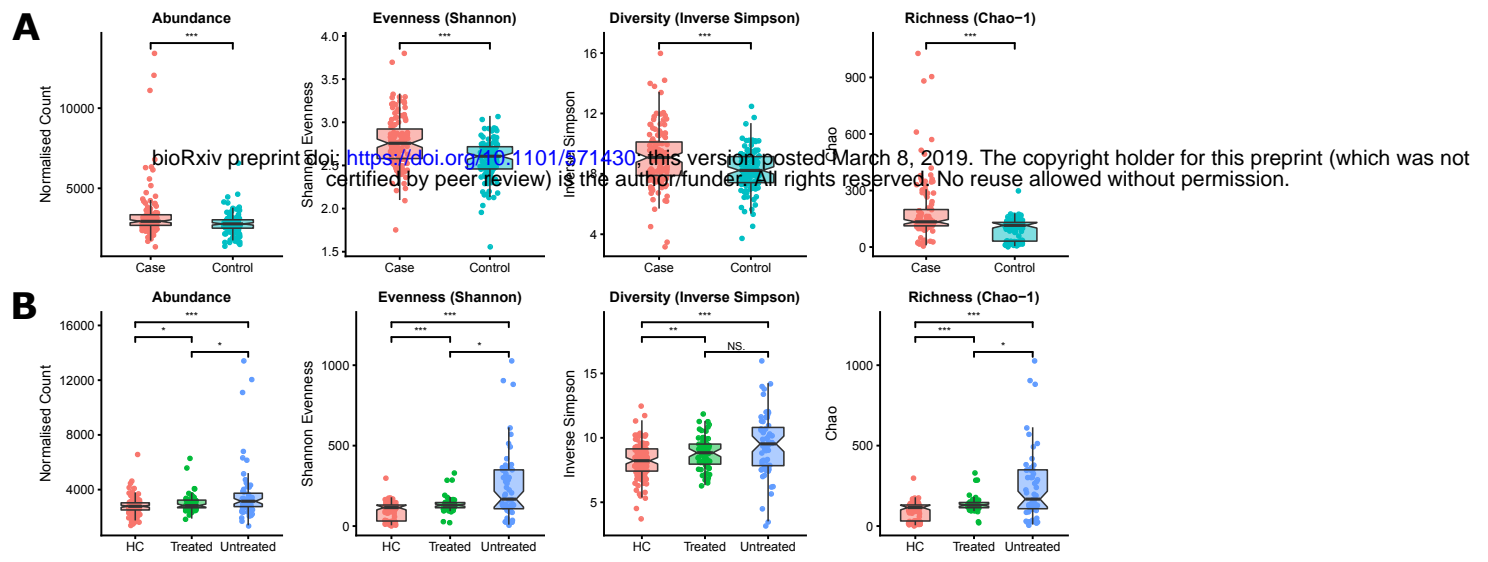

**Figure 4: A.** Enrichment, both in terms of abundance and diversity, of bacterial peptides homologous to HLA-B27 epitopes in AS cases relative to healthy controls. **B.** Differential abundance and diversity of bacterial peptides homologous to HLA-B27 epitopes in TNFi-treated and –untreated cases, and healthy controls.

| Epitope ID | HLA-B27 subtype                           | Sequence               |
|------------|-------------------------------------------|------------------------|
| 490238     | B2702;B2704                               | ARFKSNVTKTMKGFY        |
| 493378     | B2704;B2705;B2709                         | MRLPAQLLGLLM           |
| 493505     | B2702                                     | NRHYTFYVW              |
| 491582     | B2702                                     | GRINPNSGCTNY           |
| 494083     | B2702                                     | QTTFLVDNKKVFGTHL       |
| 494108     | B2702                                     | RQIMTGFGEYSY           |
| 434944     | B2702;B2705;B2707;B2709                   | ARTPHWALF              |
| 492935     | B2703                                     | KRWESERVLSF            |
| 493023     | B2705                                     | LPVNLSTSGPF            |
| 492689     | B2703;B2707;B2709                         | KRFDDKYTLKLT           |
| 492876     | B2702                                     | KRNEDESPNKLY           |
| 442808     | B2702;B2703;B2708                         | ARLDIDPETITW           |
| 494092     | B2702                                     | RKFQPYKPFYY            |
| 495095     | B2708                                     | SRLEQGEEPWWL           |
| 490897     | B2702                                     | ERIAEFNQLQF            |
| 493564     | B2702                                     | NRQIVSGSRDKTIKLW       |
| 445935     | B2702;B2703;B2707;B2708;B2709             | KRNTFVGTPFWM           |
| 491482     | B2702;B2703;B2704;B2705;B2706;B2707;B2708 | GRFTIKSDVWSF           |
| 490741     | B2702                                     | ATTAALLLEAQAATGFLVDPVR |
| 492710     | B2703                                     | KRFFFDVGSNKY           |
| 494342     | B2707;B2709                               | RRIMRPTDVPDQGL         |
| 447192     | B2702                                     | QRGLWGGEW              |
| 492970     | B2702                                     | KRYDEVEAEGY            |
| 493651     | B2702                                     | QRAIQVDPNYAY           |
| 491073     | B2702                                     | FQWMSSRVSPNTLW         |
| 494077     | B2705                                     | QRYSLLPFWY             |

**Table 1:** Bacterial peptides homologous to HLA-B27-presented epitopes which were commonly enriched in the discovery and validation cohorts for AS cases.

bioRxiv preprint doi: <https://doi.org/10.1101/571430>; this version posted March 8, 2019. The copyright holder for this preprint (which was not certified by peer review) is the author/funder. All rights reserved. No reuse allowed without permission.
